# Supplementary material for: Point Prevalence Survey of Antimicrobial Use in Selected Tertiary Care Hospitals of Pakistan Using WHO Methodology: Results and Inferences
Source: MDPI journal article supplement (doi:10.3390/medicina59061102), 2023-06-07
Supplement: s1 [file s1]

| Description                                               | No. of Antimicrobials (%) |
|-----------------------------------------------------------|---------------------------|
| No. of surgical patients                                  | 735                       |
| No. of surgical patients prescribed AM                    | 662 (90)                  |
| No. of surgical patients prescribed AM for SP (n=662)     | 573 (87)                  |
| No. of prescribed antimicrobials for surgical prophylaxis | 1365*                     |
| Pre-surgical prophylaxis                                  | 971 (71.13)               |
| Post-Surgical prophylaxis (n=1164, 201=missing)           | 1049 (90.1)               |
| Type of treatment (For CAI & HAI)                         | 1172                      |
| Empirical                                                 | 1098 (94)                 |
| Targeted                                                  | 74 (6)                    |

**Table S1:** Comparison of Targeted vs empirical treatment in Surgical Prophylaxis, HAI and CAIs
